# Supplementary material for: Neighborhood Self-Selection: The Role of Pre-Move Health Factors on the Built and Socioeconomic Environment
Source: PubMed Central journal article supplement (PMC4626981; doi:10.3390/ijerph121012489), 2015-10-08
Supplement: ijerph-12-12489-s001.pdf [file ijerph-12-12489-s001.pdf]

## Neighborhood Self-Selection: The Role of Pre-Move Health Factors on the Built and Socioeconomic Environment

**Table S1.** Number of moves per participant among movers in the nurses' health study from 1986–2008 (n = 14,159 participants) <sup>a</sup>.

| Number of Moves | Frequency | Percent | Cumulative Frequency | Cumulative Percent |
|-----------------|-----------|---------|----------------------|--------------------|
| 1               | 8081      | 57.07   | 8081                 | 57.07              |
| 2               | 3810      | 26.91   | 11,891               | 83.98              |
| 3               | 1504      | 10.62   | 13,395               | 94.6               |
| 4               | 537       | 3.79    | 13,932               | 98.4               |
| 5               | 164       | 1.16    | 14,096               | 99.56              |
| 6               | 47        | 0.33    | 14,143               | 99.89              |
| 7               | 8         | 0.06    | 14,151               | 99.94              |
| 8               | 7         | 0.05    | 14,158               | 99.99              |
| 9               | 1         | 0.01    | 14,159               | 100                |

Note: <sup>a</sup> All analyses adjusted for pre-move age in years.

**Table S2.** Age-adjusted predicted means of neighborhood environments based on pre-move BMI categories in nurses' health study participants (n = 14,159 participants) <sup>a</sup>.

| Pre-Move BMI Categories | County Sprawl Index     | Census Tract Median Home Value   | Census Tract Median Income    | Census Tract Percent Below Poverty |
|-------------------------|-------------------------|----------------------------------|-------------------------------|------------------------------------|
|                         | Predicted Mean          | Predicted Mean (\$)              | Predicted Mean (\$)           | Predicted Mean (%)                 |
|                         | (95% CI)                | (95% CI)                         | (95% CI)                      | (95% CI)                           |
| Normal (BMI < 25)       | 105.76 (105.27, 106.25) | \$188.88K (\$186.20K, \$191.56K) | \$66.71K (\$66.17K, \$67.25K) | 6.63% (6.50%, 6.77%)               |
| Overweight (BMI 25–30)  | 104.79 (104.18, 105.41) | \$173.36K (\$170.00K, \$176.71K) | \$63.46K (\$62.78K, \$64.13K) | 6.82% (6.66%, 6.99%)               |
| Obese (BMI > 30)        | 103.92 (103.09, 104.76) | \$163.09K (\$158.55K, \$167.64K) | \$61.92K (\$61.00K, \$62.83K) | 6.93% (6.71%, 7.16%)               |

Note: <sup>a</sup> All analyses adjusted for pre-move age in years.

**Table S3.** Age-adjusted predicted means of neighborhood environment based on pre-move health factors stratified by pre- and post-2000 moves in nurses' health study participants (n = 14,159 participants) <sup>a</sup>.

| Pre-Move Health Factor Quartiles        | County Sprawl Index     |                         | Census Tract Median Home Value   |                                  |
|-----------------------------------------|-------------------------|-------------------------|----------------------------------|----------------------------------|
|                                         | Pre-2000                | Post-2000               | Pre-2000                         | Post-2000                        |
|                                         | Predicted Mean          | Predicted Mean          | Predicted Mean                   | Predicted Mean (\$)              |
|                                         | (95% CI)                | (95% CI)                | (95% CI)                         | (95% CI)                         |
| <b>BMI</b>                              |                         |                         |                                  |                                  |
| Quartile 1 (<22.5)                      | 106.78 (106.02, 107.54) | 104.15 (102.52, 105.78) | \$192.58K (\$188.64K, \$196.51K) | \$182.37K (\$173.92K, \$190.82K) |
| Quartile 2 (22.5, 24.9)                 | 105.42 (104.63, 106.20) | 105.05 (103.46, 106.63) | \$184.30K (\$180.24K, \$188.36K) | \$177.39K (\$169.15K, \$185.63K) |
| Quartile 3 (24.9, 28.3)                 | 105.45 (104.68, 106.22) | 104.36 (102.91, 105.81) | \$175.27K (\$171.28K, \$179.26K) | \$179.37K (\$171.86K, \$186.88K) |
| Quartile 4 (>28.4)                      | 103.90 (103.10, 104.70) | 102.69 (101.27, 104.11) | \$168.39K (\$164.24K, \$172.54K) | \$164.73K (\$157.36K, \$172.10K) |
| <i>p</i> for Interaction                | 0.3546                  |                         | 0.1347                           |                                  |
| <b>Pre-Move Total Physical Activity</b> |                         |                         |                                  |                                  |
| Quartile 1 (<4.0 MET Hrs/wk)            | 105.45 (104.66, 106.24) | 104.35 (102.85, 105.86) | \$175.83K (\$171.73K, \$179.93K) | \$171.96K (\$164.15K, \$179.77K) |
| Quartile 2 (4.0, 11.0 MET Hrs/wk)       | 104.90 (104.13, 105.67) | 103.53 (102.00, 105.07) | \$174.54K (\$170.56K, \$178.52K) | \$174.79K (\$166.83K, \$182.76K) |
| Quartile 3 (11.1, 25.1 MET Hrs/wk)      | 105.61 (104.83, 106.39) | 103.77 (102.25, 105.30) | \$184.12K (\$180.07K, \$188.17K) | \$174.38K (\$166.47K, \$182.29K) |
| Quartile 4 (>25.2 MET Hrs/wk)           | 105.76 (104.98, 106.53) | 104.30 (102.80, 105.80) | \$187.22K (\$183.19K, \$191.24K) | \$180.42K (\$172.63K, \$188.21K) |
| <i>p</i> for Interaction                | 0.9463                  |                         | 0.4478                           |                                  |
| <b>Pre-Move Walking</b>                 |                         |                         |                                  |                                  |
| Quartile 1 (<1.2 MET Hrs/wk)            | 105.11 (104.30, 105.91) | 104.91 (103.46, 106.35) | \$175.85K (\$171.66K, \$180.05K) | \$174.93K (\$167.43K, \$182.43K) |
| Quartile 2 (1.7, 3.1 MET Hrs/wk)        | 105.26 (104.45, 106.06) | 103.40 (101.86, 104.94) | \$177.49K (\$173.30K, \$181.68K) | \$167.77K (\$159.75K, \$175.79K) |
| Quartile 3 (3.8, 7.5 MET Hrs/wk)        | 105.43 (104.65, 106.22) | 103.17 (101.60, 104.74) | \$180.12K (\$176.04K, \$184.21K) | \$175.74K (\$167.57K, \$183.90K) |
| Quartile 4 (>7.5 MET Hrs/wk)            | 105.80 (105.08, 106.52) | 104.33 (102.82, 105.83) | \$186.63K (\$182.89K, \$190.36K) | \$182.94K (\$175.09K, \$190.78K) |
| <i>p</i> for Interaction                | 0.3596                  |                         | 0.5769                           |                                  |

Note: <sup>a</sup> All analyses adjusted for pre-move age in years.

**Table S4.** Predicted means of neighborhood environment based on pre-move health factors stratified by age 65 in nurses' health study participants (n = 14,159 participants).

| Pre-Move Health Factor Quartiles        | County Sprawl Index     |                         | Census Tract Median Home Value   |                                  |
|-----------------------------------------|-------------------------|-------------------------|----------------------------------|----------------------------------|
|                                         | <Age 65                 | ≥Age 65                 | <Age 65                          | ≥Age 65                          |
|                                         | Predicted Mean          | Predicted Mean          | Predicted Mean                   | Predicted Mean (\$)              |
|                                         | (95% CI)                | (95% CI)                | (95% CI)                         | (95% CI)                         |
| <b>BMI</b>                              |                         |                         |                                  |                                  |
| Quartile 1 (<22.5)                      | 107.02 (106.19, 107.86) | 104.82 (103.61, 106.02) | \$195.42K (\$191.09K, \$199.75K) | \$180.96K (\$174.69K, \$187.23K) |
| Quartile 2 (22.5, 24.9)                 | 105.49 (104.62, 106.36) | 105.07 (103.87, 106.26) | \$187.08K (\$182.58K, \$191.58K) | \$175.13K (\$168.95K, \$181.32K) |
| Quartile 3 (24.9, 28.3)                 | 105.47 (104.61, 106.33) | 104.78 (103.67, 105.88) | \$177.52K (\$173.06K, \$181.98K) | \$173.95K (\$168.22K, \$179.69K) |
| Quartile 4 (>28.4)                      | 103.85 (102.97, 104.73) | 103.19 (102.05, 104.34) | \$169.90K (\$165.34K, \$174.46K) | \$163.47K (\$157.55K, \$169.40K) |
| <i>p</i> for Interaction                | 0.3091                  |                         | 0.1611                           |                                  |
| <b>Pre-Move Total Physical Activity</b> |                         |                         |                                  |                                  |
| Quartile 1 (<4.0 MET Hrs/wk)            | 105.31 (104.44, 106.18) | 105.04 (103.87, 106.20) | \$177.62K (\$173.09K, \$182.15K) | \$170.30K (\$164.25K, \$176.35K) |
| Quartile 2 (4.0, 11.0 MET Hrs/wk)       | 104.94 (104.09, 105.78) | 104.03 (102.86, 105.21) | \$177.25K (\$172.86K, \$181.63K) | \$169.44K (\$163.34K, \$175.54K) |
| Quartile 3 (11.1, 25.1 MET Hrs/wk)      | 105.79 (104.93, 106.65) | 104.20 (103.04, 105.37) | \$186.64K (\$182.15K, \$191.12K) | \$173.84K (\$167.80K, \$179.90K) |
| Quartile 4 (>25.2 MET Hrs/wk)           | 105.99 (105.13, 106.85) | 104.50 (103.36, 105.64) | \$189.84K (\$185.36K, \$194.32K) | \$178.70K (\$172.78K, \$184.63K) |
| <i>p</i> for Interaction                | 0.567                   |                         | 0.7026                           |                                  |
| <b>Pre-Move Walking</b>                 |                         |                         |                                  |                                  |
| Quartile 1 (<1.2 MET Hrs/wk)            | 105.04 (103.87, 106.20) | 104.58 (103.42, 105.74) | \$170.30K (\$164.25K, \$176.35K) | \$170.40K (\$164.38K, \$176.42K) |
| Quartile 2 (1.7, 3.1 MET Hrs/wk)        | 104.03 (102.86, 105.21) | 104.64 (103.43, 105.85) | \$169.44K (\$163.34K, \$175.54K) | \$165.85K (\$159.56K, \$172.13K) |
| Quartile 3 (3.8, 7.5 MET Hrs/wk)        | 104.20 (103.04, 105.37) | 104.08 (102.87, 105.28) | \$173.84K (\$167.80K, \$179.90K) | \$176.92K (\$170.67K, \$183.17K) |
| Quartile 4 (>7.5 MET Hrs/wk)            | 104.50 (103.36, 105.64) | 104.48 (103.39, 105.56) | \$178.70K (\$172.78K, \$184.62K) | \$178.34K (\$172.71K, \$183.97K) |
| <i>p</i> for Interaction                | 0.5896                  |                         | 0.2104                           |                                  |

**Table S5.** Age-aAdjusted predicted means of neighborhood environment based on pre-move health factors stratified by husband’s highest education in nurses’ health study participants (n = 14,159 participants) <sup>a</sup>.

| Pre-Move Health Factor Quartiles        | County Sprawl Index     |                         | Census Tract Median Home Value   |                                  |
|-----------------------------------------|-------------------------|-------------------------|----------------------------------|----------------------------------|
|                                         | High School or Less     | More than High School   | High School or Less              | More than High School            |
|                                         | Predicted Mean          | Predicted Mean          | Predicted Mean                   | Predicted Mean (\$)              |
|                                         | (95% CI)                | (95% CI)                | (95% CI)                         | (95% CI)                         |
| <b>BMI</b>                              |                         |                         |                                  |                                  |
| Quartile 1 (<22.5)                      | 104.06 (102.62, 105.50) | 106.68 (105.74, 107.62) | \$172.67K (\$165.21K, \$180.13K) | \$199.95K (\$195.05K, \$204.85K) |
| Quartile 2 (22.5, 24.9)                 | 103.71 (102.37, 105.05) | 105.40 (104.40, 106.41) | \$165.89K (\$158.94K, \$172.83K) | \$191.65K (\$186.43K, \$196.87K) |
| Quartile 3 (24.9, 28.3)                 | 103.73 (102.49, 104.98) | 105.48 (104.47, 106.49) | \$164.45K (\$157.99K, \$170.90K) | \$183.07K (\$177.85K, \$188.29K) |
| Quartile 4 (>28.4)                      | 102.21 (101.00, 103.41) | 103.71 (102.60, 104.81) | \$157.96K (\$151.70K, \$164.21K) | \$176.11K (\$170.37K, \$181.85K) |
| <i>p</i> for Interaction                | 0.9691                  |                         | 0.5678                           |                                  |
| <b>Pre-Move Total Physical Activity</b> |                         |                         |                                  |                                  |
| Quartile 1 (<4.0 MET Hrs/wk)            | 103.54 (102.33, 104.75) | 105.84 (104.75, 106.92) | \$163.98K (\$157.68K, \$170.29K) | \$184.59K (\$178.96K, \$190.23K) |
| Quartile 2 (4.0, 11.0 MET Hrs/wk)       | 102.50 (101.24, 103.77) | 104.73 (103.71, 105.75) | \$160.87K (\$154.31K, \$167.43K) | \$182.41K (\$177.12K, \$187.70K) |
| Quartile 3 (11.1, 25.1 MET Hrs/wk)      | 103.86 (102.54, 105.18) | 105.37 (104.37, 106.37) | \$168.87K (\$162.02K, \$175.71K) | \$190.32K (\$185.14K, \$195.50K) |
| Quartile 4 (>25.2 MET Hrs/wk)           | 103.58 (102.15, 105.01) | 105.81 (104.86, 106.77) | \$165.37K (\$157.95K, \$172.79K) | \$195.57K (\$190.61K, \$200.54K) |
| <i>p</i> for Interaction                | 0.7837                  |                         | 0.6798                           |                                  |
| <b>Pre-Move Walking</b>                 |                         |                         |                                  |                                  |
| Quartile 1 (<1.2 MET Hrs/wk)            | 103.58 (102.32, 104.85) | 105.73 (104.65, 106.81) | \$164.55K (\$157.97K, \$171.13K) | \$186.14K (\$180.53K, \$191.75K) |
| Quartile 2 (1.7, 3.1 MET Hrs/wk)        | 102.59 (101.29, 103.90) | 105.54 (104.46, 106.61) | \$162.95K (\$156.16K, \$169.74K) | \$184.35K (\$178.79K, \$189.92K) |
| Quartile 3 (3.8, 7.5 MET Hrs/wk)        | 103.71 (102.37, 105.06) | 104.67 (103.65, 105.68) | \$166.25K (\$159.29K, \$173.21K) | \$188.35K (\$183.08K, \$193.62K) |
| Quartile 4 (>7.5 MET Hrs/wk)            | 103.51 (102.23, 104.80) | 105.77 (104.87, 106.68) | \$164.85K (\$158.19K, \$171.51K) | \$193.58K (\$188.87K, \$198.30K) |
| <i>p</i> for Interaction                | 0.4490                  |                         | 0.0779                           |                                  |

Note: <sup>a</sup> All analyses adjusted for pre-move age in years.
